# Supplementary material for: Assessment of colistin heteroresistance among multidrug-resistant Klebsiella pneumoniae isolated from intensive care patients in Europe
Source: Preprints.org preprint supplement (doi:10.20944/preprints202403.0381.v1), 2024-03-07
Supplement: Supplementary file 1 [file supplementary]

**Supplementary Table 1:** Summary of interventions including amount of isolates within each intervention per sample category Table provides an overview of the contents of the different intervention strategies as well as the number of isolates sorted per sample category for both the complete collection (n=676) and the selected subset (n=288) of isolates. Surv. = surveillance, Clin. = clinical, CS = colistin sulphate, TBS = tobramycin sulphate, NYS = nystatin. <sup>1</sup>2% mouthwash replaced by 1% oral gel after reports of oral mucosal adverse events. <sup>2</sup>Normally regiment includes four days IV cephalosporin but not included because of settings of moderate/high resistance. <sup>3</sup>Either sampling during 1 month wash-out/in period between intervention strategies or interruption of the intervention

| Intervention                                                 | Contents of intervention                                                                                                                                                                                                       | No. of isolates |       |     |       |
|--------------------------------------------------------------|--------------------------------------------------------------------------------------------------------------------------------------------------------------------------------------------------------------------------------|-----------------|-------|-----|-------|
| Baseline                                                     | Daily CHX 2% body washing + hand hygiene improvement program (WHO). Optional extra: CHX mouthwash (0.12 or 0.20%) if this was already part of regular care                                                                     |                 | Surv. | PPS | Clin. |
|                                                              |                                                                                                                                                                                                                                | All             | 106   | 35  | 15    |
|                                                              |                                                                                                                                                                                                                                | Selected        | 66    | 10  | 2     |
| Chlorhexidine digluconate (CHX)                              | CHX 2% mouthwash/1% oral gel <sup>1</sup>                                                                                                                                                                                      | All             | 98    | 39  | 12    |
|                                                              |                                                                                                                                                                                                                                | Selected        | 52    | 13  | 2     |
| Selective oropharyngeal decontamination (SOD)                | Mouthpaste (oropharynx) containing: CS (0.19 million units), TBS (10 mg) and NYS (0.1 million units/0.5 g)                                                                                                                     | All             | 107   | 40  | 13    |
|                                                              |                                                                                                                                                                                                                                | Selected        | 49    | 14  | 5     |
| Selective digestive tract decontamination (SDD) <sup>2</sup> | Mouthpaste (oropharynx): containing: CS (0.19 million units), TBS (10 mg) and NYS (0.1 million units/0.5 g)<br>Suspension (gastrointestinal tract) containing: CS (1.9 million units), TBS (80 mg) and NYS (2.0 million units) | All             | 91    | 24  | 10    |
|                                                              |                                                                                                                                                                                                                                | Selected        | 46    | 11  | 2     |
| Wash-in/out period or interrupted                            |                                                                                                                                                                                                                                | All             | 63    | 14  | 9     |
|                                                              |                                                                                                                                                                                                                                | Selected        | 13    | 2   | 1     |
