# Supplementary material for: Assessment of colistin heteroresistance among multidrug-resistant Klebsiella pneumoniae isolated from intensive care patients in Europe
Source: Preprints.org preprint supplement (doi:10.20944/preprints202403.0381.v1), 2024-03-07
Supplement: Supplementary file 2 [file supplementary]

**Supplementary Table 4:** Number of MDR and CP-Kpn isolates. Tables gives summary of the number of MDR and CP-Kpn selected CS and CHR isolates. For CS, MDR and CP-Kpn classification was not possible for four and three isolates respectively of which one isolate was also CHR following C2. For CHR, C1+C2 represents the total amount of isolates fulfilling C2 whilst C2 alone represents isolates only fulfilling C2.

|                          | Total | MDR |    | CP-Kpn |     |
|--------------------------|-------|-----|----|--------|-----|
|                          |       | +   | -  | +      | -   |
| <b>CS<br/>(selected)</b> | 288   | 244 | 40 | 80     | 205 |
| <b>CHR C1</b>            | 25    | 19  | 6  | 9      | 16  |
| <b>CHR C2</b>            | 83    | 72  | 10 | 23     | 59  |
