# Supplementary material for: Assessment of colistin heteroresistance among multidrug-resistant Klebsiella pneumoniae isolated from intensive care patients in Europe
Source: Preprints.org preprint supplement (doi:10.20944/preprints202403.0381.v1), 2024-03-07
Supplement: Supplementary file 3 [file supplementary]

**Supplementary Table 3:** Number of MDR and CP-Kpn isolates. Tables gives summary of the number of MDR and CP-Kpn CS and CR isolates. For CS, MDR and CP-Kpn classification was not possible for five and three isolates respectively.

|           | Total | MDR |    | CP-Kpn |     |
|-----------|-------|-----|----|--------|-----|
|           |       | +   | -  | +      | -   |
| <b>CS</b> | 597   | 539 | 53 | 174    | 420 |
| <b>CR</b> | 79    | 78  | 1  | 57     | 22  |
