# Supplementary material for: Assessment of colistin heteroresistance among multidrug-resistant Klebsiella pneumoniae isolated from intensive care patients in Europe
Source: Preprints.org preprint supplement (doi:10.20944/preprints202403.0381.v1), 2024-03-07
Supplement: Supplementary file 4 [file supplementary]

**Supplementary Table 2:** Overview of selected isolates. Table gives an overview of the selected isolates (n=288) and their characteristics. Cat. = category, Surv. = surveillance, Clin. = clinical, Undef. = undefined.

| Isolate ID | Country | Cat.  | Intervention | ST type | K-<br>antigen<br>type | O-<br>antigen<br>type | Col<br>MIC<br>(mg/L) | C<br>H<br>R | M<br>D<br>R | C<br>P |
|------------|---------|-------|--------------|---------|-----------------------|-----------------------|----------------------|-------------|-------------|--------|
| AN0157O    | BEL     | Surv. | Baseline     | 11      | KL105                 | O2v2                  | 0.25                 | 2           | +           | +      |
| AN0222CP   | BEL     | Surv. | Baseline     | 530     | KL54                  | O1/O2v2               | 0.5                  | -           | -           | -      |
| AN0328E    | BEL     | Surv. | Baseline     | 323     | KL21                  | O3b                   | 0.5                  | -           | +           | -      |
| AN0980CP   | BEL     | Surv. | Baseline     | 504     | KL110                 | O1v1                  | 0.5                  | 2           | +           | -      |
| AN1092CP1  | BEL     | Surv. | Baseline     | 160     | KL62                  | O1v1                  | 0.25                 | -           | +           | -      |
| AN1505CP2  | BEL     | Surv. | SDD          | 323     | KL21                  | O3b                   | 1                    | 1           | +           | -      |
| AN1876CP2  | BEL     | PPS   | SDD          | 2004    | KL23                  | O2v2                  | 1                    | -           | +           | -      |
| AN2029CP   | BEL     | Surv. | SDD          | 34      | KL38                  | O3b                   | 0.5                  | -           | -           | -      |
| AN2262CP   | BEL     | PPS   | SDD          | 219     | KL114                 | O1/O2v1               | 1                    | -           | +           | -      |
| AN2496CP   | BEL     | PPS   | SDD          | 15      | KL62                  | O1v1                  | 0.25                 | 2           | +           | -      |
| AN2784CP   | BEL     | Surv. | SDD          | 13      | KL3                   | O1v2                  | 0.5                  | 2           | +           | -      |
| AN2982CP   | BEL     | Surv. | SDD          | 323     | KL21                  | O3b                   | 1                    | -           | +           | -      |
| AN2991E2   | BEL     | Surv. | SDD          | 3031    | KL124                 | O3/O3a                | 0.5                  | -           | -           | -      |
| AN3090CP   | BEL     | Surv. | SDD          | 323     | KL21                  | O3b                   | 0.5                  | -           | +           | -      |
| AN3573CP   | BEL     | Surv. | CHX          | 45      | KL24                  | O2v1                  | 1                    | 1           | +           | +      |
| AN3603CP   | BEL     | Surv. | CHX          | 147     | KL64                  | O2v1                  | 0.5                  | 2           | +           | -      |
| AN4337CP2  | BEL     | Surv. | CHX          | 1709    | KL70                  | OL102                 | 0.25                 | -           | -           | -      |
| AN4440CP   | BEL     | Surv. | CHX          | 513     | KL14                  | O3b                   | 0.5                  | -           | +           | -      |
| AN5000CP   | BEL     | PPS   | SOD          | 39      | KL149                 | O1v2                  | 0.5                  | -           | -           | -      |
| AN5043CP   | BEL     | Surv. | Wash-in/out  | 13      | KL3                   | O1v2                  | 1                    | -           | +           | +      |
| AN5207CP   | BEL     | PPS   | SOD          | 307     | KL102                 | O2v2                  | 1                    | -           | +           | -      |
| AN5764E    | BEL     | Surv. | SOD          | 307     | KL102                 | O2v2                  | 0.25                 | -           | +           | -      |
| AN6344CP   | BEL     | PPS   | SOD          | 15      | KL62                  | O1v1                  | 0.125                | 2           | +           | -      |
| AN6484CP   | BEL     | PPS   | SOD          | 872     | KL153                 | O2v2                  | 0.25                 | -           | -           | -      |
| AN6502E    | BEL     | Surv. | SOD          | 884     | KL150                 | O3b                   | 1                    | -           | +           | -      |
| AN6511CP   | BEL     | Surv. | SOD          | 323     | KL21                  | O3b                   | 0.25                 | -           | +           | -      |
| AN6607CP   | BEL     | Surv. | Wash-in/out  | 1876    | KL15                  | O4                    | 0.25                 | -           | -           | -      |
| BC0043     | ESP     | Surv. | Baseline     | 147     | KL64                  | O2v1                  | 1                    | -           | +           | -      |
| BC0133CP   | ESP     | PPS   | Baseline     | 101     | KL17                  | O1v1                  | 0.25                 | -           | +           | +      |
| BC0275CP   | ESP     | PPS   | CHX          | 1083    | KL132                 | O1v1                  | 0.5                  | 2           | +           | +      |
| BC0294E    | ESP     | Surv. | CHX          | 323     | KL21                  | O3b                   | 0.25                 | -           | +           | -      |
| BC0365     | ESP     | Surv. | CHX          | 392     | KL27                  | O4                    | 1                    | -           | +           | -      |
| BC0386     | ESP     | PPS   | CHX          | 485     | KL22                  | O3b                   | 1                    | -           | +           | -      |
| BC0495     | ESP     | PPS   | CHX          | 101     | KL17                  | O1v1                  | 0.0625               | 2           | +           | +      |
| BC0501     | ESP     | PPS   | CHX          | 20      | KL28                  | O1v2                  | 1                    | 2           | -           | -      |
| BC0504     | ESP     | Surv. | CHX          | 101     | KL17                  | O1v1                  | 0.5                  | 2           | +           | +      |
| BC0602     | ESP     | Surv. | SDD          | 405     | KL151                 | O4                    | 1                    | -           | +           | -      |
| BC0650     | ESP     | Surv. | SDD          | 17      | KL25                  | O5                    | 0.5                  | 2           | -           | -      |
| CD0391E    | UK      | Clin. | Baseline     | 983     | KL127                 | OL101                 | 0.5                  | -           | +           | -      |

|           |     |       |             |      |       |         |       |   |    |    |
|-----------|-----|-------|-------------|------|-------|---------|-------|---|----|----|
| CD0687E   | UK  | Surv. | Baseline    | 628  | KL123 | O3b     | 1     | - | +  | -  |
| CD0692E   | UK  | Surv. | SOD         | 37   | KL7   | OL104   | 0.5   | - | NA | -  |
| CD0794C/E | UK  | Surv. | SOD         | 340  | KL123 | O4      | 1     | - | +  | -  |
| CD0833E   | UK  | Surv. | SOD         | 20   | KL28  | O1v2    | 0.5   | 2 | +  | +  |
| CD0950CP  | UK  | Surv. | SOD         | 20   | KL28  | O1v2    | 1     | - | +  | +  |
| CD1069E   | UK  | Surv. | SOD         | 628  | KL36  | O3b     | 1     | 2 | +  | -  |
| CD1221CP  | UK  | PPS   | SOD         | 14   | KL2   | O1/O2v1 | 0.5   | 2 | -  | -  |
| CD1279O   | UK  | Surv. | SOD         | 678  | KL15  | O4      | 2     | 1 | -  | -  |
| CD1506E   | UK  | Surv. | CHX         | 45   | KL24  | O2v1    | 0.5   | - | +  | NA |
| CD1695E   | UK  | Surv. | CHX         | 628  | KL123 | O3b     | 1     | - | +  | -  |
| CD1892E   | UK  | PPS   | CHX         | 15   | KL19  | O1/O2v2 | 1     | 1 | +  | -  |
| CD1901E   | UK  | Surv. | CHX         | 48   | KL62  | O1v1    | 1     | 2 | +  | -  |
| CD2009E   | UK  | Surv. | CHX         | 45   | KL24  | O2v1    | 0.5   | - | NA | -  |
| CD2110E   | UK  | PPS   | SDD         | 307  | KL102 | O2v2    | 1     | - | +  | -  |
| CD2409E   | UK  | Surv. | SDD         | 628  | KL123 | O3b     | 0.5   | 2 | +  | -  |
| FE0004    | ESP | Surv. | Baseline    | 3293 | KL60  | O3b     | 0.5   | - | +  | -  |
| FE0017    | ESP | Surv. | Baseline    | 1427 | KL67  | OL101   | 0.25  | - | +  | -  |
| FE0022    | ESP | Surv. | Baseline    | 1427 | KL67  | OL101   | 1     | - | +  | -  |
| FE0051    | ESP | Surv. | Baseline    | 437  | KL36  | O4      | 0.5   | - | +  | -  |
| FE0117    | ESP | Surv. | Baseline    | 391  | KL30  | O1v2    | 1     | 2 | +  | +  |
| FE0164    | ESP | PPS   | Baseline    | 405  | KL151 | O4      | 1     | 1 | +  | -  |
| FE0245    | ESP | PPS   | Baseline    | 76   | KL21  | O3/O3a  | 1     | 2 | +  | +  |
| FE0256    | ESP | Surv. | Baseline    | 147  | KL64  | O2v1    | 0.5   | - | +  | +  |
| FE0389    | ESP | Surv. | Baseline    | 11   | KL13  | OL104   | 0.5   | - | +  | -  |
| FE0467    | ESP | Surv. | Baseline    | 437  | KL36  | O4      | 1     | - | +  | +  |
| FE0501    | ESP | Surv. | Baseline    | 76   | KL21  | O3/O3a  | 1     | 2 | +  | +  |
| FE0710    | ESP | Surv. | SDD         | 17   | KL66  | O2v2    | 2     | 2 | +  | +  |
| FE0777    | ESP | Surv. | SDD         | 147  | KL64  | O2v1    | 2     | - | +  | -  |
| FE0780    | ESP | Surv. | SDD         | 147  | KL64  | O2v1    | 1     | - | +  | -  |
| FE0820    | ESP | Surv. | SDD         | 134  | KL25  | O5      | 1     | 2 | +  | +  |
| FE0883    | ESP | Surv. | SDD         | 437  | KL36  | O4      | 0.5   | - | +  | +  |
| FE0992    | ESP | Clin. | SDD         | 70   | KL136 | O1v2    | 0.5   | 2 | +  | -  |
| FE1068    | ESP | Surv. | SDD         | 76   | KL21  | O3/O3a  | 0.125 | - | -  | -  |
| FE1279    | ESP | PPS   | SOD         | 147  | KL64  | O2v1    | 0.25  | - | +  | -  |
| FE1312    | ESP | Surv. | SOD         | 437  | KL36  | O4      | 0.5   | 2 | +  | -  |
| FE1385    | ESP | Surv. | SOD         | 323  | KL21  | O3b     | 1     | - | +  | -  |
| FE1455    | ESP | Surv. | SOD         | 76   | KL21  | O3/O3a  | 2     | 1 | +  | +  |
| FE1669    | ESP | Surv. | SOD         | 101  | KL17  | O1v1    | 1     | 2 | +  | NA |
| FE1762    | ESP | Surv. | CHX         | 147  | KL64  | O2v1    | 0.5   | - | +  | +  |
| FE1764    | ESP | Surv. | CHX         | 437  | KL36  | O4      | 0.5   | 2 | +  | +  |
| FE1825    | ESP | Surv. | CHX         | 147  | KL64  | O2v1    | 1     | - | +  | +  |
| FE2000    | ESP | Surv. | Wash-in/out | 1117 | KL117 | O1v1    | 1     | 2 | +  | +  |
| GL0060E   | SVN | PPS   | Baseline    | 14   | KL105 | O2v2    | 1     | 2 | -  | -  |
| GL0080E   | SVN | Surv. | Baseline    | 15   | KL2   | O1v1    | 0.5   | - | +  | -  |
| GL0746E   | SVN | Surv. | CHX         | 15   | KL16  | O1v1    | 0.5   | 2 | +  | -  |
| GL1380O   | SVN | PPS   | Wash-in/out | 11   | KL24  | O1v1    | 0.25  | - | -  | -  |
| GL1600E   | SVN | PPS   | SDD         | 39   | KL24  | O1v1    | 0.5   | - | +  | -  |
| GL2607E   | SVN | PPS   | SOD         | 15   | KL112 | O1v1    | 1     | - | +  | -  |
| GL2639E   | SVN | Surv. | SOD         | 15   | KL24  | O1v1    | 1     | - | +  | -  |

|           |     |       |             |         |       |         |       |   |   |   |
|-----------|-----|-------|-------------|---------|-------|---------|-------|---|---|---|
| IT0032E   | ITA | Surv. | Baseline    | 914     | KL81  | OL101   | 0.5   | - | - | - |
| IT0035E   | ITA | Surv. | Baseline    | 15      | KL24  | O1v1    | 0.5   | - | + | - |
| IT0046CP1 | ITA | Surv. | Baseline    | 307     | KL102 | O2v2    | 0.5   | - | + | + |
| IT0061O   | ITA | Surv. | Baseline    | 15      | KL24  | O1v1    | 0.5   | 2 | + | - |
| IT0064CP  | ITA | Surv. | Baseline    | 307     | KL102 | O2v2    | 1     | - | + | + |
| IT0067CP  | ITA | Surv. | Baseline    | 307     | KL102 | O2v2    | 0.5   | 2 | + | + |
| IT0075CP  | ITA | Surv. | Baseline    | 307     | KL102 | O2v2    | 2     | - | + | + |
| IT0080CP  | ITA | Surv. | Baseline    | 307     | KL102 | O2v2    | 1     | - | + | + |
| IT0082CP3 | ITA | Surv. | Baseline    | 307     | KL102 | O2v2    | 1     | - | + | + |
| IT0087CP  | ITA | Surv. | Baseline    | 45      | KL62  | O2v1    | 0.5   | - | + | + |
| IT0097CP  | ITA | Surv. | Baseline    | 307     | KL102 | O2v2    | 2     | - | + | + |
| IT0115CP  | ITA | Surv. | Baseline    | 636     | KL61  | O5      | 0.5   | 1 | + | + |
| IT0132CP  | ITA | Surv. | Baseline    | 101     | KL17  | O1v1    | 1     | - | + | + |
| IT0162CP  | ITA | Surv. | Baseline    | 258/512 | KL107 | O2v2    | 0.25  | 2 | + | + |
| IT0164E   | ITA | Surv. | Baseline    | 101     | KL17  | O1v1    | 0.5   | 2 | + | - |
| IT0195CP  | ITA | Surv. | SDD         | 307     | KL102 | O2v2    | 1     | - | + | + |
| IT0218CP  | ITA | Surv. | SDD         | 307     | KL102 | O2v2    | 2     | - | + | + |
| IT0238CP  | ITA | Surv. | SDD         | 307     | KL102 | O2v2    | 0.25  | - | + | + |
| IT0244CP  | ITA | Surv. | SDD         | 409     | KL9   | O3b     | 0.5   | 1 | + | + |
| IT0246CP  | ITA | Surv. | SDD         | 258/512 | KL107 | O2v2    | 2     | - | + | + |
| IT0251CP  | ITA | Surv. | SDD         | 307     | KL102 | O2v2    | 2     | - | + | + |
| IT0302CP  | ITA | Surv. | SDD         | 409     | KL9   | O3b     | 0.25  | 2 | + | + |
| IT0329O   | ITA | Surv. | SDD         | 409     | KL9   | O3b     | 0.125 | 2 | + | + |
| IT0341CP  | ITA | PPS   | SDD         | 307     | KL102 | O2v2    | 2     | - | + | + |
| IT0349O   | ITA | PPS   | SDD         | 23      | KL1   | O1v2    | 0.25  | - | - | - |
| IT0361E   | ITA | Surv. | SDD         | 307     | KL102 | O2v2    | 0.125 | 1 | + | + |
| IT0370E   | ITA | PPS   | SOD         | 409     | KL9   | O3b     | 1     | - | + | - |
| IT0374CP  | ITA | Surv. | Wash-in/out | 101     | KL17  | O1v1    | 0.25  | - | + | + |
| IT0385CP  | ITA | Surv. | SOD         | 101     | KL17  | O1v1    | 0.25  | - | + | + |
| IT0386CP  | ITA | Surv. | SOD         | 307     | KL102 | O2v2    | 1     | - | + | + |
| IT0394CP  | ITA | Surv. | SOD         | 101     | KL17  | O1v1    | 0.5   | 2 | + | + |
| IT0403O   | ITA | Surv. | SOD         | 307     | KL102 | O2v2    | 0.125 | - | + | - |
| IT0429    | ITA | Surv. | SOD         | 101     | KL17  | O1v1    | 0.5   | - | + | + |
| IT0444CP  | ITA | Surv. | SOD         | 307     | KL102 | O2v2    | 2     | - | + | + |
| IT0450CP2 | ITA | Surv. | SOD         | 307     | KL102 | O2v2    | 0.5   | - | + | + |
| IT0481E   | ITA | Surv. | SOD         | 985     | KL39  | O1v2    | 1     | 1 | + | - |
| IT0548E   | ITA | Surv. | Interrupted | 14      | KL16  | O1v1    | 1     | - | + | - |
| IT0591E   | ITA | Surv. | Interrupted | 107     | KL103 | O1/O2v1 | 0.5   | 2 | + | - |
| IT0598CP  | ITA | Surv. | Interrupted | 353     | KL110 | O3b     | 0.5   | 2 | - | - |
| IT0649O   | ITA | Surv. | SOD         | 409     | KL9   | O3b     | 0.25  | - | + | - |
| IT0685O   | ITA | PPS   | SOD         | 104     | KL31  | O3b     | 1     | - | - | - |
| IT0693O   | ITA | Surv. | SOD         | 45      | KL62  | O2v1    | 0.25  | - | + | + |
| IT0700O   | ITA | Surv. | SOD         | 409     | KL9   | O3b     | 2     | - | + | - |
| IT0728CP  | ITA | PPS   | CHX         | 101     | KL17  | O1v1    | 0.25  | 2 | + | + |
| IT0733O   | ITA | Surv. | Wash-in/out | 15      | KL24  | O1v1    | 1     | 2 | + | - |
| IT0739E   | ITA | Surv. | CHX         | 409     | KL9   | O3b     | 0.25  | - | + | - |
| IT0753CP  | ITA | Surv. | CHX         | 258/512 | KL107 | O2v2    | 0.5   | - | + | + |
| IT0758CP  | ITA | Surv. | CHX         | 101     | KL17  | O1v1    | 0.5   | - | + | + |
| IT0821    | ITA | Surv. | CHX         | 258/512 | KL107 | O2v2    | 1     | - | + | + |

|           |     |       |             |         |       |        |       |   |    |   |
|-----------|-----|-------|-------------|---------|-------|--------|-------|---|----|---|
| IT0846O   | ITA | Clin. | CHX         | 392     | KL27  | O4     | 0.25  | 2 | +  | - |
| IT0849CP  | ITA | Surv. | CHX         | 307     | KL102 | O2v2   | 1     | - | +  | + |
| IT0866CP  | ITA | Surv. | CHX         | 515     | KL62  | O1v1   | 0.125 | - | +  | + |
| IT0867E   | ITA | Surv. | CHX         | 515     | KL62  | O1v1   | 0.25  | 2 | +  | - |
| IT0886E   | ITA | Surv. | CHX         | 409     | KL9   | O3b    | 0.5   | 2 | +  | - |
| IT0904E   | ITA | PPS   | CHX         | 14      | KL16  | O1v1   | 1     | - | NA | - |
| IT0948E   | ITA | Surv. | CHX         | 16      | KL51  | O3b    | 0.5   | - | +  | - |
| IT0954O   | ITA | Surv. | CHX         | 405     | KL151 | O4     | 1     | - | +  | - |
| IT0966E   | ITA | Surv. | CHX         | 16      | KL51  | O3b    | 0.25  | 2 | +  | - |
| KG0086E   | BEL | Surv. | Baseline    | 437     | KL36  | O4     | 1     | 2 | +  | - |
| KG0275E   | BEL | Surv. | Baseline    | 15      | KL48  | O1v1   | 0.125 | - | +  | - |
| KG0312E   | BEL | Surv. | SOD         | 437     | KL36  | O4     | 0.5   | 2 | +  | - |
| KG0316E   | BEL | Surv. | SOD         | 15      | KL48  | O1v1   | 0.125 | 1 | +  | - |
| KG0641E   | BEL | Surv. | SDD         | 15      | KL48  | O1v1   | 0.5   | - | +  | - |
| KG0663E   | BEL | PPS   | SDD         | 307     | KL102 | O2v2   | 0.5   | 2 | +  | - |
| LB0060E2  | BEL | Surv. | Baseline    | 37      | KL118 | OL101  | 0.5   | - | +  | - |
| LB0063E   | BEL | Clin. | Baseline    | 25      | KL2   | O1v2   | 0.5   | 2 | -  | - |
| LB0066CP  | BEL | Surv. | Baseline    | 258/512 | KL107 | O2v2   | 0.25  | 1 | +  | + |
| LB0085E2  | BEL | Surv. | Baseline    | 792     | KL25  | O3/O3a | 0.5   | 2 | -  | - |
| LB0323E   | BEL | Surv. | Baseline    | 15      | KL112 | O1v1   | 1     | 2 | +  | - |
| LB0343E   | BEL | PPS   | Baseline    | 556     | KL62  | O2v1   | 1     | 1 | -  | - |
| LB0464O   | BEL | Surv. | Baseline    | 15      | KL24  | O1v1   | 0.5   | 2 | +  | - |
| LB0500O   | BEL | Surv. | Baseline    | 4398    | KL126 | OL101  | 1     | - | -  | - |
| LB0743O   | BEL | Surv. | Baseline    | 38      | KL52  | OL101  | 1     | - | -  | - |
| LB0785E   | BEL | Surv. | Baseline    | 405     | KL111 | O3/O3a | 1     | 1 | +  | - |
| LB1218CP  | BEL | Clin. | CHX         | 258/512 | KL107 | O2v2   | 0.5   | 2 | +  | + |
| LB1231E   | BEL | Surv. | CHX         | 15      | KL24  | O1v1   | 0.5   | 2 | +  | - |
| LB1326E   | BEL | Surv. | CHX         | 11      | KL105 | O2v2   | 0.25  | - | +  | - |
| LB1372E   | BEL | PPS   | CHX         | 193     | KL30  | O1v2   | 0.25  | 1 | -  | - |
| LB1577E   | BEL | Surv. | CHX         | Undef.  | KL151 | O4     | 1     | 2 | +  | - |
| LB1695E   | BEL | Surv. | CHX         | 45      | KL24  | O2v1   | 2     | 1 | -  | - |
| LB1819E   | BEL | Surv. | CHX         | 36      | KL27  | O2v2   | 0.125 | 2 | +  | - |
| LB1945CP2 | BEL | Surv. | CHX         | 258/512 | KL107 | O2v2   | 0.25  | - | +  | + |
| LB1946CP  | BEL | Surv. | CHX         | 258/512 | KL107 | O2v2   | 0.5   | 2 | +  | + |
| LB2042E   | BEL | Surv. | CHX         | 20      | KL28  | O1v2   | 1     | - | -  | - |
| LB2337E   | BEL | Surv. | CHX         | 348     | KL62  | O1v1   | 1     | - | +  | - |
| LB2549E   | BEL | PPS   | SOD         | 193     | KL30  | O1v2   | 0.5   | 2 | +  | - |
| LB2648E3  | BEL | Clin. | SOD         | 17      | KL127 | OL101  | 0.5   | 2 | +  | - |
| LB2711E   | BEL | Surv. | SOD         | 20      | KL28  | O1v2   | 2     | - | +  | - |
| LB2716E   | BEL | Surv. | SOD         | 11      | KL15  | O4     | 1     | - | -  | - |
| LB2737E   | BEL | Surv. | SOD         | 17      | KL127 | OL101  | 0.5   | 2 | +  | - |
| LB2880O4  | BEL | Surv. | SOD         | 405     | KL151 | O4     | 0.5   | - | +  | - |
| LB3091E   | BEL | Surv. | SOD         | 25      | KL2   | O1v2   | 0.5   | 2 | +  | - |
| LB3189E3  | BEL | Surv. | SOD         | 1214    | KL51  | O2v2   | 1     | 2 | +  | - |
| LB3246E   | BEL | Surv. | SOD         | 15      | KL24  | O1v1   | 1     | - | +  | - |
| LB3311CP  | BEL | Surv. | SOD         | 258/512 | KL107 | O2v2   | 1     | - | +  | + |
| LB3880E   | BEL | Surv. | Interrupted | 405     | KL151 | O4     | 0.5   | - | +  | - |
| LB4058CP  | BEL | Surv. | Interrupted | 894     | KL58  | O3b    | 0.125 | - | +  | + |
| LB4191E   | BEL | Surv. | Interrupted | 48      | KL124 | O1v1   | 0.25  | 2 | -  | - |

|          |     |       |             |         |       |        |        |   |   |   |
|----------|-----|-------|-------------|---------|-------|--------|--------|---|---|---|
| LB4210E2 | BEL | Clin. | Interrupted | 405     | KL151 | O4     | 0.25   | - | + | - |
| LB4438E  | BEL | PPS   | Interrupted | 17      | KL25  | O5     | 0.5    | 1 | - | - |
| LB4884E  | BEL | PPS   | SDD         | 628     | KL123 | O3b    | 1      | - | + | - |
| LB5023O  | BEL | Surv. | SDD         | 147     | KL64  | O2v1   | 0.5    | - | + | - |
| LB5205CP | BEL | Surv. | SDD         | 405     | KL151 | OL102  | 1      | - | + | + |
| LB5245CP | BEL | Surv. | SDD         | 307     | KL102 | O2v2   | 0.5    | 1 | + | + |
| LB5310O  | BEL | Surv. | SDD         | 15      | KL24  | O1v1   | 0.25   | 2 | + | - |
| LB5524E  | BEL | Surv. | SDD         | Undef.  | KL151 | O4     | 1      | - | + | - |
| LB5773E  | BEL | Surv. | SDD         | Undef.  | KL151 | O4     | 0.0625 | - | + | - |
| OT0108CP | BEL | Surv. | Baseline    | 258/512 | KL106 | O2v2   | 0.5    | - | + | + |
| OT0246E1 | BEL | Surv. | Baseline    | 405     | KL151 | O4     | 0.5    | - | + | - |
| OT1141E  | BEL | Surv. | SDD         | 405     | KL151 | O4     | 0.25   | - | + | - |
| OT1208E  | BEL | Surv. | Wash-in/out | 35      | KL110 | O1v1   | 0.5    | - | + | - |
| OT1486E  | BEL | Surv. | CHX         | 3449    | KL58  | O5     | 2      | 2 | + | - |
| OT1558E  | BEL | PPS   | CHX         | 35      | KL110 | O1v1   | 0.5    | - | + | - |
| PS0015E  | ESP | Surv. | Baseline    | 326     | KL25  | O1v1   | 0.5    | 2 | + | - |
| PS0030E  | ESP | Surv. | Baseline    | 11      | KL13  | O3b    | 0.5    | - | + | - |
| PS0161E  | ESP | Surv. | Baseline    | 392     | KL27  | O4     | 1      | - | + | - |
| PS0202E  | ESP | Surv. | Baseline    | 429     | KL27  | O4     | 0.25   | - | + | - |
| PS0230E  | ESP | Surv. | Baseline    | 15      | KL19  | O1v1   | 0.125  | - | + | - |
| PS0231E  | ESP | PPS   | Baseline    | 340     | KL55  | O3b    | 2      | 1 | + | - |
| PS0304CP | ESP | Surv. | Baseline    | 258/512 | KL107 | O2v2   | 0.5    | 2 | + | + |
| PS0477CP | ESP | Surv. | Baseline    | 258/512 | KL107 | O2v2   | 0.25   | 1 | + | + |
| PS0670E  | ESP | Surv. | Baseline    | 35      | KL22  | O1v1   | 0.5    | 2 | + | - |
| PS0902E  | ESP | Surv. | SOD         | 11      | KL105 | O2v2   | 1      | - | + | - |
| PS1641E  | ESP | PPS   | SOD         | 15      | KL19  | O1v1   | 0.5    | - | + | - |
| PS1653E2 | ESP | PPS   | SOD         | 34      | KL117 | O2v2   | 2      | - | + | - |
| PS1684E  | ESP | Surv. | SOD         | 101     | KL17  | O1v1   | 0.5    | - | - | - |
| PS1694E  | ESP | Surv. | SOD         | 392     | KL27  | O4     | 1      | - | + | - |
| PS1712E1 | ESP | Surv. | SOD         | 1296    | KL105 | O3b    | 1      | - | + | - |
| PS1767E  | ESP | Surv. | SOD         | 2604    | KL60  | O3/O3a | 1      | 2 | + | - |
| PS1778E2 | ESP | PPS   | SOD         | 11      | KL60  | O5     | 2      | - | + | - |
| PS1793E  | ESP | Surv. | SOD         | 323     | KL21  | O3b    | 1      | - | + | - |
| PS1812E  | ESP | Surv. | CHX         | 20      | KL28  | O1v2   | 1      | - | - | - |
| PS1901E  | ESP | Surv. | CHX         | 307     | KL102 | O2v2   | 0.25   | - | + | - |
| PS1975E  | ESP | Surv. | CHX         | 326     | KL25  | O1v1   | 2      | - | + | - |
| PS2052CP | ESP | Surv. | CHX         | 258/512 | KL107 | O2v2   | 0.25   | - | + | + |
| PS2061E  | ESP | PPS   | CHX         | 2703    | KL16  | O3b    | 0.5    | - | + | - |
| PS2066CP | ESP | Surv. | CHX         | 15      | KL112 | O1v1   | 1      | - | + | + |
| PS2109E  | ESP | Surv. | CHX         | 429     | KL27  | O4     | 2      | - | + | - |
| PS2249E1 | ESP | Surv. | CHX         | 3451    | KL105 | O4     | 0.5    | - | + | - |
| PS2459E  | ESP | Surv. | CHX         | 15      | KL19  | O1v2   | 1      | 2 | + | - |
| PS2892E  | ESP | PPS   | SDD         | 556     | KL62  | O2v1   | 2      | - | - | - |
| PS2965E  | ESP | PPS   | SDD         | 15      | KL48  | O1v1   | 1      | - | + | - |
| PS3264E1 | ESP | Surv. | SDD         | 219     | KL114 | O1v1   | 0.125  | - | + | - |
| PS3273E1 | ESP | Surv. | SDD         | 252     | KL30  | O1v1   | 1      | 1 | + | - |
| PS3274E  | ESP | Surv. | SDD         | 326     | KL25  | O1v1   | 0.5    | - | + | - |
| PS3372E  | ESP | Surv. | SDD         | 70      | KL136 | O1v2   | 1      | 1 | + | - |
| SA0044   | PRT | Surv. | Baseline    | 15      | KL19  | O1v2   | 0.5    | - | + | - |

|            |     |       |             |        |       |       |        |   |   |    |
|------------|-----|-------|-------------|--------|-------|-------|--------|---|---|----|
| SA0072     | PRT | Surv. | Baseline    | 461    | KL112 | O1v2  | 0.5    | - | + | -  |
| SA0165     | PRT | Surv. | Baseline    | 15     | KL19  | O1v2  | 0.25   | - | + | -  |
| SA0192     | PRT | Surv. | Baseline    | 348    | KL62  | O1v1  | 0.5    | - | + | -  |
| SA0215     | PRT | Surv. | Baseline    | 13     | KL3   | O1v2  | 2      | - | + | -  |
| SA0221     | PRT | Surv. | Baseline    | 34     | KL10  | O1v2  | 0.25   | - | + | -  |
| SA0241     | PRT | PPS   | Baseline    | Undef. | KL124 | OL101 | 0.5    | 2 | - | -  |
| SA0275     | PRT | Surv. | Baseline    | 405    | KL151 | O4    | 0.5    | - | + | -  |
| SA0287     | PRT | Surv. | Baseline    | 348    | KL62  | O1v1  | 1      | - | + | -  |
| SA0311     | PRT | Surv. | Baseline    | 34     | KL10  | O2v2  | 1      | 1 | + | -  |
| SA0449     | PRT | Surv. | SDD         | 307    | KL102 | O2v2  | 2      | - | + | -  |
| SA0465     | PRT | Surv. | SDD         | 405    | KL151 | O4    | 1      | - | + | -  |
| SA0478     | PRT | Surv. | SDD         | Undef. | KL64  | O2v1  | 1      | - | + | +  |
| SA0483     | PRT | Surv. | SDD         | 15     | KL19  | O1v2  | 0.5    | - | + | -  |
| SA0491     | PRT | Surv. | SDD         | 15     | KL19  | O1v2  | 0.25   | 2 | + | -  |
| SA0517     | PRT | PPS   | CHX         | 45     | KL24  | O2v1  | 0.25   | 2 | + | -  |
| SA0528     | PRT | Surv. | CHX         | 15     | KL19  | O1v2  | 1      | - | + | -  |
| SA0555     | PRT | PPS   | CHX         | 348    | KL62  | O1v1  | 0.5    | 2 | + | -  |
| SA0590     | PRT | Surv. | CHX         | 11     | KL25  | O5    | 1      | - | + | +  |
| SA0690     | PRT | Surv. | SOD         | 348    | KL62  | O1v1  | 0.5    | - | + | -  |
| SA0694     | PRT | Surv. | SOD         | 1271   | KL28  | O1v2  | 1      | - | - | -  |
| SA0741     | PRT | Surv. | SOD         | 147    | KL64  | O2v1  | 0.5    | - | + | +  |
| SA0746     | PRT | Surv. | SOD         | 1695   | KL163 | O2v1  | 0.25   | 2 | + | -  |
| UZ0571E    | BEL | PPS   | Baseline    | 37     | KL38  | O3b   | 0.5    | 2 | + | -  |
| UZ0911O    | BEL | Surv. | Baseline    | 11     | KL105 | O2v2  | 1      | 2 | - | -  |
| UZ1295O    | BEL | PPS   | Baseline    | 15     | KL62  | O1v1  | 1      | - | + | -  |
| UZ1812     | BEL | PPS   | Baseline    | 1565   | KL31  | O3b   | 1      | - | + | -  |
| UZ1963E    | BEL | Surv. | Baseline    | 45     | KL24  | O2v1  | 2      | 1 | - | -  |
| UZ2466E    | BEL | PPS   | CHX         | 29     | KL19  | O1v2  | 0.25   | - | + | NA |
| UZ2482E    | BEL | Surv. | CHX         | 307    | KL102 | O2v2  | 1      | - | + | -  |
| UZ3622E    | BEL | Surv. | Interrupted | 1      | KL45  | O1v2  | 0.125  | 2 | + | -  |
| UZ4152O    | BEL | PPS   | SOD         | 37     | KL23  | O2v2  | 1      | - | + | -  |
| UZ4205E    | BEL | Clin. | SOD         | 152    | KL149 | O4    | 1      | - | + | -  |
| UZ4233O1   | BEL | Surv. | SOD         | 1427   | KL155 | OL101 | 1      | - | - | -  |
| UZ4601CP/E | BEL | Surv. | SOD         | 1017   | KL58  | O3b   | 0.25   | 2 | + | +  |
| UZ5772O    | BEL | Surv. | SDD         | 17     | KL25  | O5    | 0.5    | - | - | -  |
| UZ6482E    | BEL | Surv. | SDD         | Undef. | KL30  | O1v2  | 1      | - | - | -  |
| UZ6832E    | BEL | Clin. | SDD         | 152    | KL149 | O4    | 0.25   | 2 | + | -  |
| UZ6865O    | BEL | Surv. | SDD         | Undef. | KL30  | O1v2  | 1      | - | - | -  |
| VR0060E    | PRT | Surv. | Baseline    | 307    | KL102 | O2v2  | 0.125  | - | + | -  |
| VR0062E    | PRT | Surv. | Baseline    | 45     | KL24  | O2v1  | 1      | - | + | -  |
| VR0144E    | PRT | Surv. | Baseline    | 307    | KL19  | O1v2  | 1      | - | + | -  |
| VR0231E    | PRT | Surv. | SDD         | 34     | KL10  | O1v1  | 1      | 2 | + | -  |
| VR0321E    | PRT | Surv. | SDD         | 4      | KL128 | O3b   | 0.0625 | - | + | +  |
| VR0382CP   | PRT | Surv. | SOD         | 922    | KL64  | O2v1  | 0.5    | - | + | +  |
| VR0452E    | PRT | Surv. | SOD         | 147    | KL23  | O2v2  | 0.5    | 2 | + | -  |
| VR0533E    | PRT | Clin. | SOD         | 280    | KL64  | O2v1  | 1      | - | + | -  |
| VR0556E    | PRT | Clin. | SOD         | 377    | KL15  | O4    | 1      | - | + | -  |
| VR0588E/C  | PRT | Clin. | SOD         | 34     | KL64  | O2v1  | 0.25   | 2 | + | +  |
| VR0601E    | PRT | Surv. | CHX         | 147    | KL1   | O1v2  | 0.5    | - | + | +  |

|                |     |       |     |     |       |      |      |   |   |   |
|----------------|-----|-------|-----|-----|-------|------|------|---|---|---|
| <b>VR0664E</b> | PRT | Surv. | CHX | 15  | KL10  | O2v2 | 0.25 | 1 | + | + |
| <b>VR0750E</b> | PRT | Surv. | CHX | 34  | KL25  | O5   | 0.25 | 2 | + | - |
| <b>VR0774E</b> | PRT | Surv. | CHX | 11  | KL17  | O1v1 | 2    | - | + | + |
| <b>VR0782E</b> | PRT | Surv. | CHX | 870 | KL102 | O2v2 | 0.5  | 2 | + | + |
