# Supplementary material for: Assessment of colistin heteroresistance among multidrug-resistant Klebsiella pneumoniae isolated from intensive care patients in Europe
Source: Preprints.org preprint supplement (doi:10.20944/preprints202403.0381.v1), 2024-03-07
Supplement: Supplementary file 5 [file supplementary]

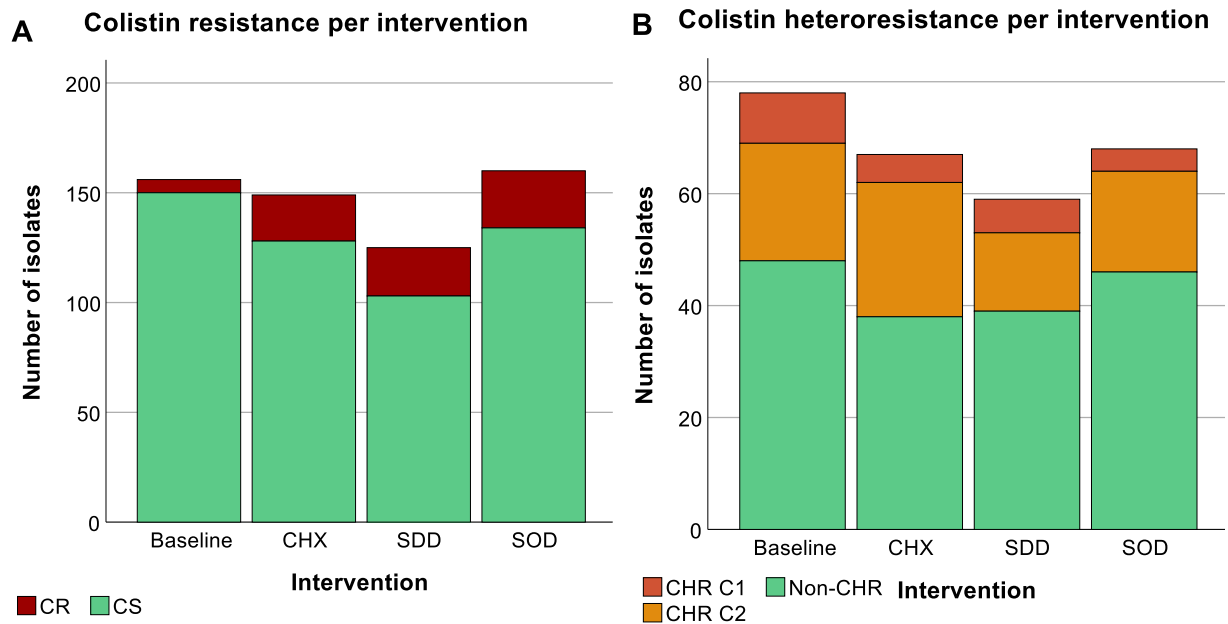

**Supplementary Figure 1:** Distribution of isolates across baseline and intervention strategies.

Graphs show the number of isolates per strategy as well as the number of CR/HR and CS/non-CHR isolates. Of note C1+C2 represents the total amount of isolates fulfilling C2 whilst C2 alone represents isolates only fulfilling C2. (A) CR per intervention strategy, (B) CHR per intervention strategy.
