# Supplementary material for: Assessment of colistin heteroresistance among multidrug-resistant Klebsiella pneumoniae isolated from intensive care patients in Europe
Source: Preprints.org preprint supplement (doi:10.20944/preprints202403.0381.v1), 2024-03-07
Supplement: Supplementary file 6 [file supplementary]

Archive with 5 entries (5 files):
- Supplementary Figure 1.pdf
- Supplementary Table 1.pdf
- Supplementary Table 2.pdf
- Supplementary Table 3.pdf
- Supplementary Table 4.pdf
